# Supplementary material for: Surveillance of 3′ Noncoding Transcripts Requires FIERY1 and XRN3 in Arabidopsis
Source: PubMed Central journal article supplement (PMC3337477; doi:10.1534/g3.111.001362), 2012-04-01
Supplement: supp_2.4.487_FigureS7.pdf [file supp_2.4.487_FigureS7.pdf]

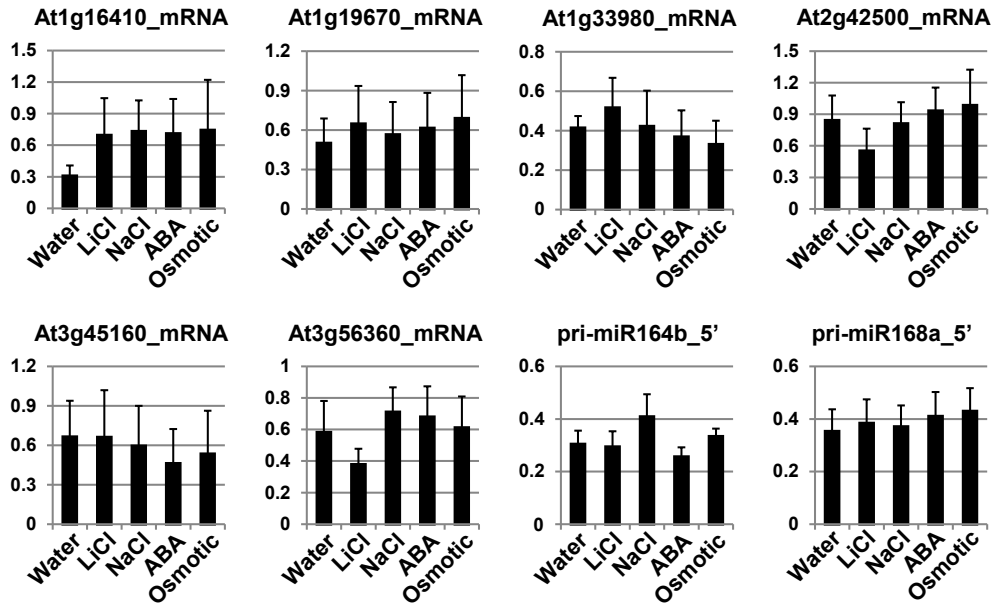

**Figure S7** Quantitative RT-PCR analysis of 5' mRNAs and pri-miRNA\_5's of representative genes after various plant stress treatments. Vertical axes show relative accumulation normalized against ACT2 expression.
